# Supplementary material for: Iron/cobalt/nickel regulation for efficient photocatalytic carbon dioxide reduction over phthalocyanine covalent organic frameworks
Source: Royal Society of Chemistry journal article supplement (doi:10.1039/d3nr04387h), 2023-01-01
Supplement: d3nr04387h1.pdf [file d3nr04387h1.pdf]

## Supporting Information

# Iron/Cobalt/Nickel Regulation for Efficient Photocatalytic Carbon Dioxide Reduction over Phthalocyanine Covalent Organic Frameworks

Qiqi Zhang<sup>a,b</sup>, Meiyang Chen<sup>a,b</sup>, Yanjie Zhang<sup>a</sup>, Yuansong Ye<sup>a</sup>, Diwen Liu<sup>\*c</sup>, Chao Xu<sup>b</sup>, Zuju Ma<sup>d</sup>, BenYong Lou<sup>\*a</sup>, Rusheng Yuan<sup>b</sup>, Rongjian Sa<sup>\*a,b</sup>

<sup>a</sup>College of Materials and Chemical Engineering, Minjiang University, Fuzhou, 350108, China  
Email: [lby@mju.edu.cn](mailto:lby@mju.edu.cn); [rjsa@mju.edu.cn](mailto:rjsa@mju.edu.cn)

<sup>b</sup>State Key Laboratory of Photocatalysis on Energy and Environment, College of Chemistry, Fuzhou University, Fuzhou 350108, China

<sup>c</sup>School of Materials and Chemical Engineering, Pingxiang University, Pingxiang 337055, China  
Email: [liudiwen1987@163.com](mailto:liudiwen1987@163.com)

<sup>d</sup>School of Environmental and Materials Engineering, Yantai University, Yantai, 264005, China

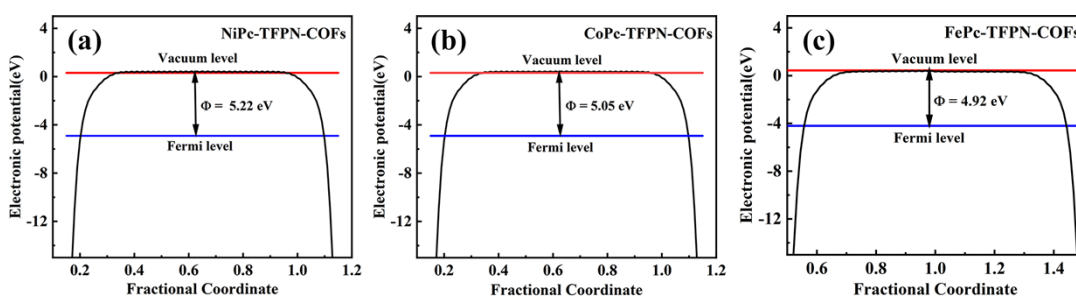

Figure S1: The work function of MPC-TFPN-COFs (a) NiPc-TFPN-COFs, (b) CoPc-TFPN-COFs, (c) FePc-TFPN-COFs

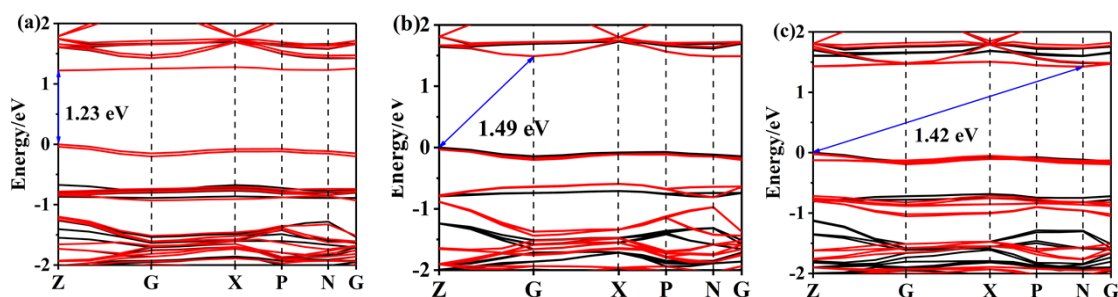

Figure S2: Band structure NiPC-TFPN-CoFs (a), CoPC-TFPN-CoFs (b), FePC-TFPN-CoFs (c).

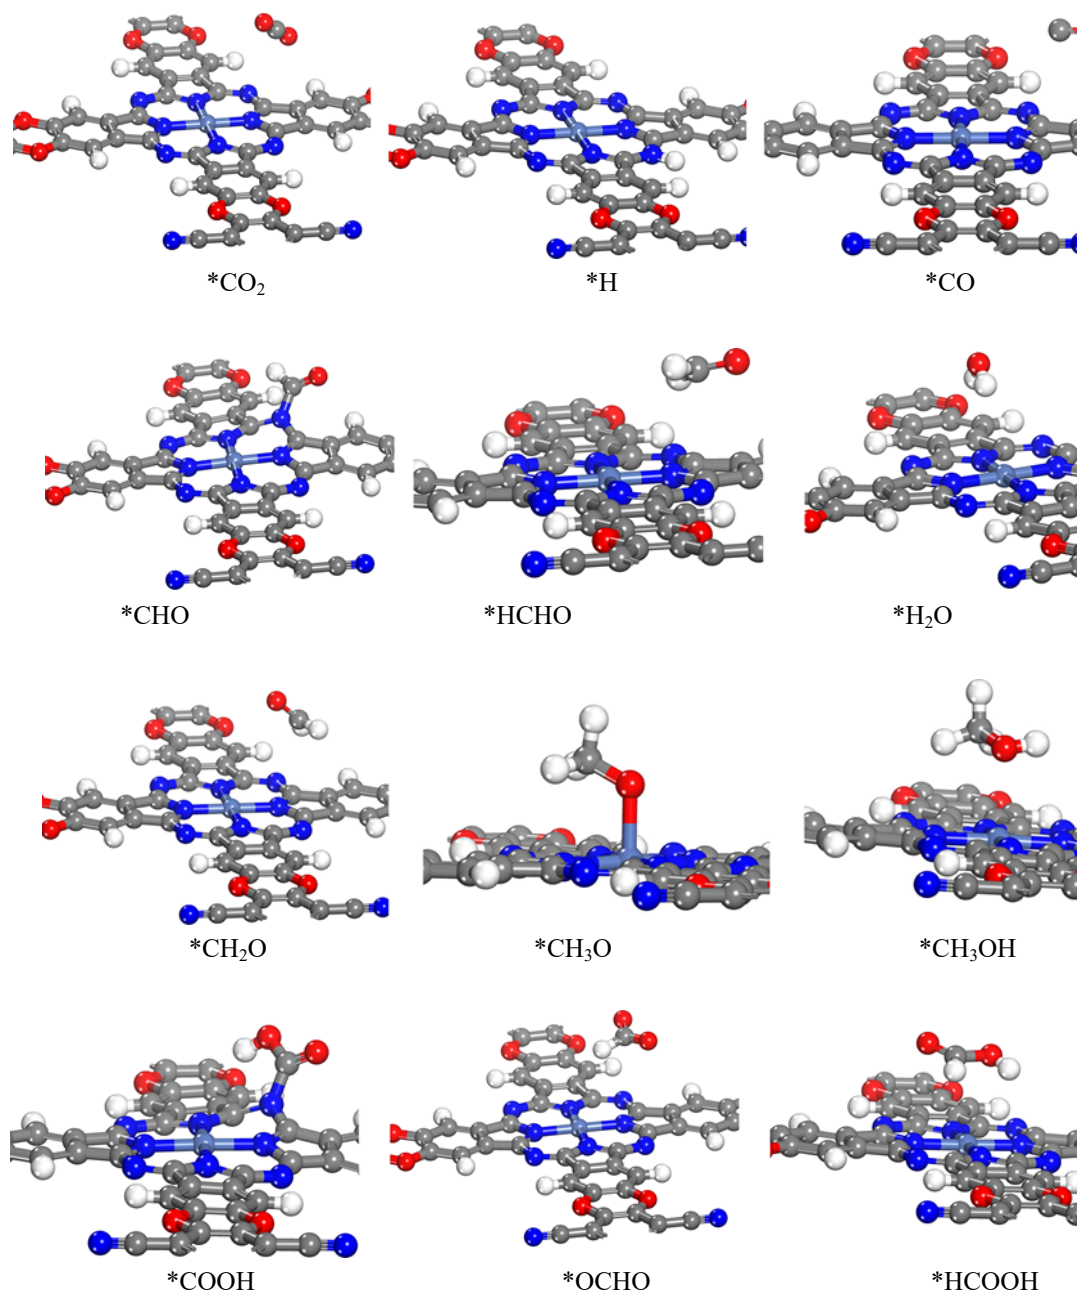

Figure S3: Stable adsorption configurations of adsorbents on NiPc-TFPN-CoFs

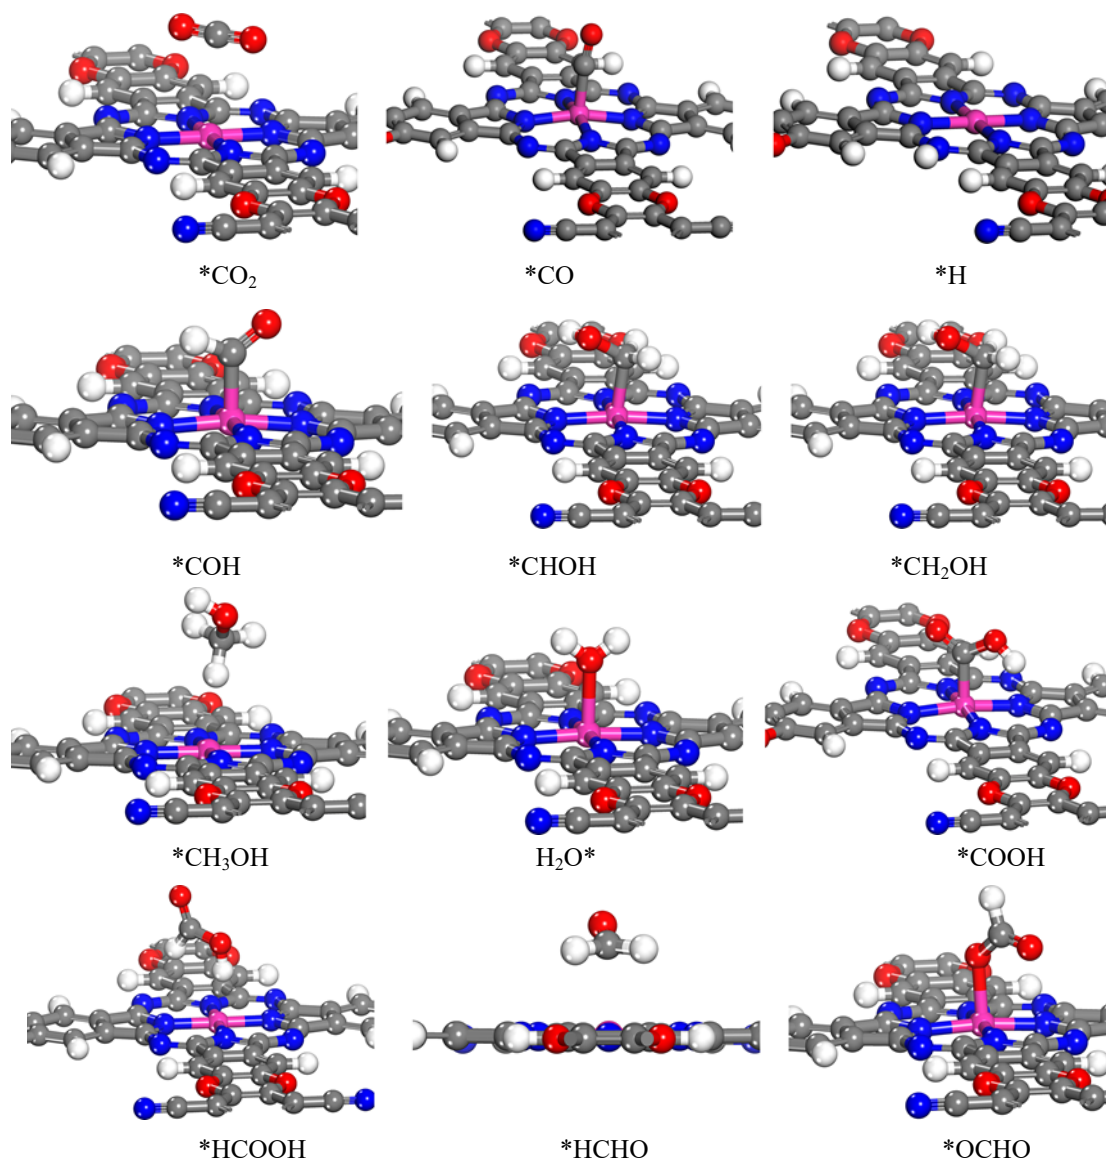

Figure S4: Stable adsorption configurations of adsorbents on CoPc-TFPN-COFs

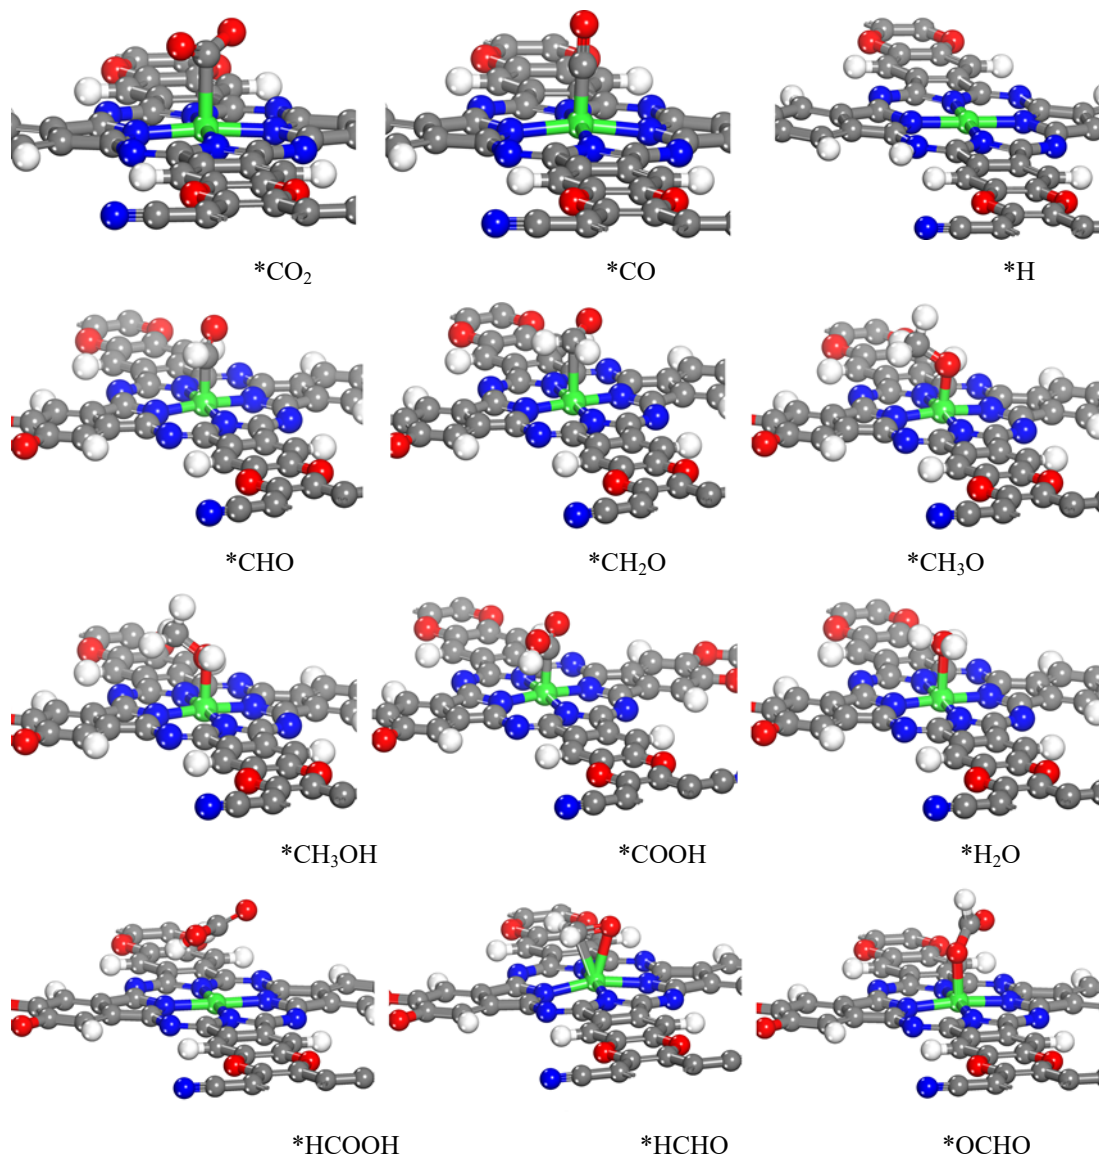

Figure S5: Stable adsorption configurations of adsorbents on FePc-TFPN-COFs

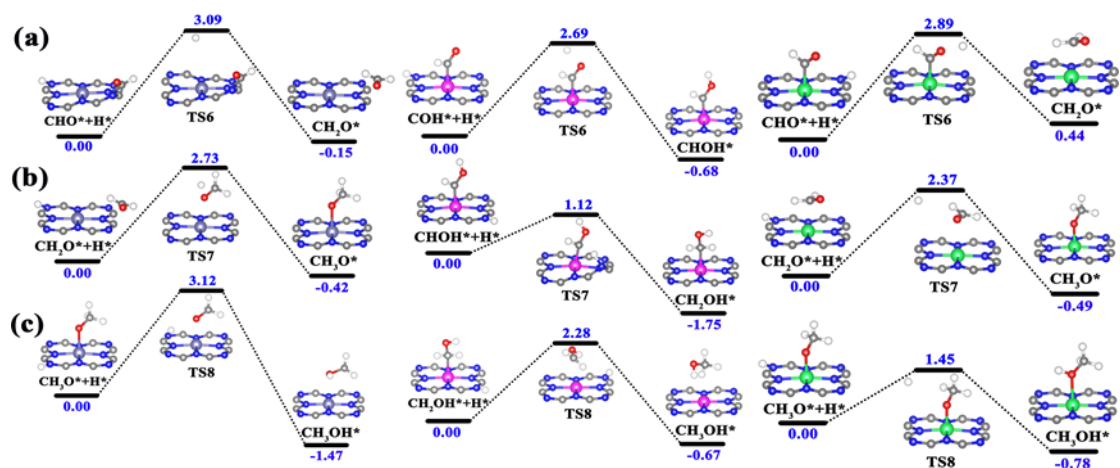

Figure S6: The energy barrier of CO<sub>2</sub> reduction reaction to CH<sub>3</sub>OH catalyzed by (a) NiPc-TFPN-COFs, (b) CoPc-TFPN-COFs and (c) FePc-TFPN-COFs.

| M  | adsorbates          | $E_{\text{ads}}$ | $d(\text{M-CO}_2)$ |
|----|---------------------|------------------|--------------------|
| Ni | *CO <sub>2</sub>    | -0.67            | 3.02               |
|    | *COOH               | -1.55            | 1.42               |
|    | *OCHO               | -2.12            | 2.51               |
|    | *HCOOH              | -0.51            | 3.06               |
|    | *CO                 | -0.48            | 3.16               |
|    | *CHO                | -1.85            | 1.40               |
|    | *COH                | -1.39            | 1.53               |
|    | *CH <sub>2</sub> O  | -0.50            | 2.68               |
|    | *CH <sub>3</sub> O  | -1.12            | 2.06               |
|    | *CHOH               | -2.17            | 1.33               |
|    | *CH <sub>2</sub> OH | -1.72            | 1.49               |
|    | *H                  | -1.33            | 1.02               |
|    | *H <sub>2</sub> O   | -1.54            | 2.64               |
|    | *CH <sub>3</sub> OH | -1.63            | 2.77               |
|    | *HCHO               | -0.50            | 2.75               |
| Co | *CO <sub>2</sub>    | -0.76            | 3.11               |
|    | *COOH               | -3.97            | 1.90               |
|    | *OCHO               | -2.21            | 1.74               |
|    | *HCOOH              | -0.69            | 3.52               |
|    | *CO                 | -0.67            | 1.99               |
|    | *CHO                | -2.26            | 1.87               |
|    | *COH                | -2.26            | 1.84               |
|    | *CH <sub>2</sub> O  | -0.65            | 2.48               |
|    | *CH <sub>3</sub> O  | -1.61            | 1.96               |
|    | *CHOH               | -1.84            | 1.80               |
|    | *CH <sub>2</sub> OH | -2.21            | 1.20               |
|    | *H                  | -0.11            | 1.02               |
|    | *H <sub>2</sub> O   | -0.42            | 3.12               |
|    | *CH <sub>3</sub> OH | -0.56            | 3.19               |
|    | *HCHO               | -0.64            | 2.46               |
| Fe | *CO <sub>2</sub>    | -0.77            | 2.11               |
|    | *COOH               | -3.14            | 1.95               |
|    | *OCHO               | -2.97            | 1.91               |
|    | *HCOOH              | -0.58            | 3.04               |
|    | *CO                 | -2.84            | 1.70               |
|    | *CHO                | -3.09            | 1.87               |
|    | *COH                | -3.06            | 1.77               |
|    | *CH <sub>2</sub> O  | -0.67            | 2.43               |
|    | *CH <sub>3</sub> O  | -2.56            | 1.86               |
|    | *CHOH               | -3.38            | 1.75               |
|    | *CH <sub>2</sub> OH | -2.86            | 2.00               |
|    | *H                  | -1.15            | 1.02               |
|    | *H <sub>2</sub> O   | -0.92            | 2.30               |
|    | *CH <sub>3</sub> OH | -0.48            | 3.04               |
|    | *HCHO               | -0.62            | 2.08               |

Table S1. The adsorption energy on the surface of MPC-TFPN-COFs and the distance of adsorbates to the surface.

| Elementary steps              | TS    | $E_{(b)}$ NiPc-TFPN-COFs | $E_{(b)}$ CoPc-TFPN-COFs | $E_{(b)}$ FePc-TFPN-COFs |
|-------------------------------|-------|--------------------------|--------------------------|--------------------------|
| *CO <sub>2</sub> + *H → *COOH | TS1-a | 2.82                     | 2.42                     | 1.33                     |
| *CO <sub>2</sub> + *H → *OCHO | TS1-b | 2.95                     | 2.81                     | 1.76                     |

Table 2 Energies of the transition states of the first protonation reaction of CRR on the surface of MPc-TFPN-COFs (eV).  $E_{(b)}$  is the energy barrier of the reaction.

| Elementary steps | TS    | $E_{(b)}$ NiPc-TFPN-COFs | $E_{(b)}$ CoPc-TFPN-COFs | $E_{(b)}$ FePc-TFPN-COFs |
|------------------|-------|--------------------------|--------------------------|--------------------------|
| *CO + *H → *CHO  | TS3-a | 1.56                     | 2.86                     | 1.77                     |
| *CO + *H → *COH  | TS3-b | 2.95                     | 1.80                     | 3.08                     |

Table 3 Energies of the transition states of the third protonation reaction of CRR on the surface of MPc-TFPN-COFs (eV).  $E_{(b)}$  is the energy barrier of the reaction.
